# Supplementary material for: Neurotensin Gene rs2234762 C>G Variant Associates with Reduced Circulating Pro-NT Levels and Predicts Lower Insulin Resistance in Overweight/Obese Children
Source: MDPI journal article supplement (doi:10.3390/ijms24076460), 2023-03-30
Supplement: s1 [file s1]

**Table S1. Bivariate analyses between plasma pro-NT and clinical/biochemical parameters**

|                               | <b>Correlation coefficient</b> | <b>p-value</b> |
|-------------------------------|--------------------------------|----------------|
| <b>Age (years)</b>            | 0.195                          | 0.019          |
| <b>BMI (Kg/m<sup>2</sup>)</b> | 0.075                          | 0.367          |
| <b>SBP (mm/Hg)</b>            | 0.035                          | 0.678          |
| <b>DBP (mm/Hg)</b>            | 0.087                          | 0.311          |
| <b>FBG 0' (mg/dl)</b>         | -0.058                         | 0.487          |
| <b>FBG 120' (mg/dl)</b>       | -0.037                         | 0.659          |
| <b>FBI 0' (μUI/ml)</b>        | 0.001                          | 0.990          |
| <b>FBI 120' (μUI/ml)</b>      | 0.131                          | 0.115          |
| <b>TC (mg/dl)</b>             | -0.035                         | 0.672          |
| <b>HDL-C (mg/dl)</b>          | -0.063                         | 0.447          |
| <b>LDL-C (mg/dl)</b>          | -0.019                         | 0.824          |
| <b>TG (mg/dl)</b>             | 0.166                          | 0.046          |
| <b>AST (U/L)</b>              | 0.030                          | 0.727          |
| <b>ALT (U/L)</b>              | 0.053                          | 0.533          |
| <b>HOMA- β</b>                | 0.017                          | 0.842          |
| <b>HOMA-IR</b>                | -0.006                         | 0.943          |
| <b>ISI</b>                    | -0.075                         | 0.371          |
| <b>SPISE</b>                  | -0.14                          | 0.091          |

Abbreviations: BMI, body mass index; SBP, systolic blood pressure; DBP, diastolic blood pressure; FBG, fasting blood glucose; FSI, fasting serum insulin; TC, total cholesterol; TG, triglycerides; HDL-C, high-density lipoprotein; LDL-C, low-density lipoprotein; AST, alanine aminotransferase; ALT, aspartate aminotransferase; HOMA-IR, homeostatic model assessment of insulin resistance; HOMA- β, homeostatic model assessment for β-cell function; ISI, insulin-sensitivity index; SPISE, single-point insulin sensitivity estimator.
